# Supplementary material for: Mediator kinase inhibition drives myometrial stem cell differentiation and the uterine fibroid phenotype through super-enhancer reprogramming
Source: PubMed Central journal article supplement (PMC11702794; doi:10.21203/rs.3.rs-5125876/v1), 2024-12-16
Supplement: NIHPPRS5125876v1-supplement-1.pdf [file NIHPPRS5125876v1-supplement-1.pdf]

## Supplementary Files

This is a list of supplementary files associated with this preprint. Click to download.

- [SupplementaryTables.docx](#)
- [SupplementaryFigureslegends.docx](#)
- [KhadkaJMMSupFigsRev120924.docx](#)
- [CUTRUNrosereults.xlsx](#)
- [RNAseqdeseq2results.xlsx](#)
